# Supplementary material
Source: HighWire-hosted journal article supplement (https://bmjopen.bmj.com/content/15/5/e086789)

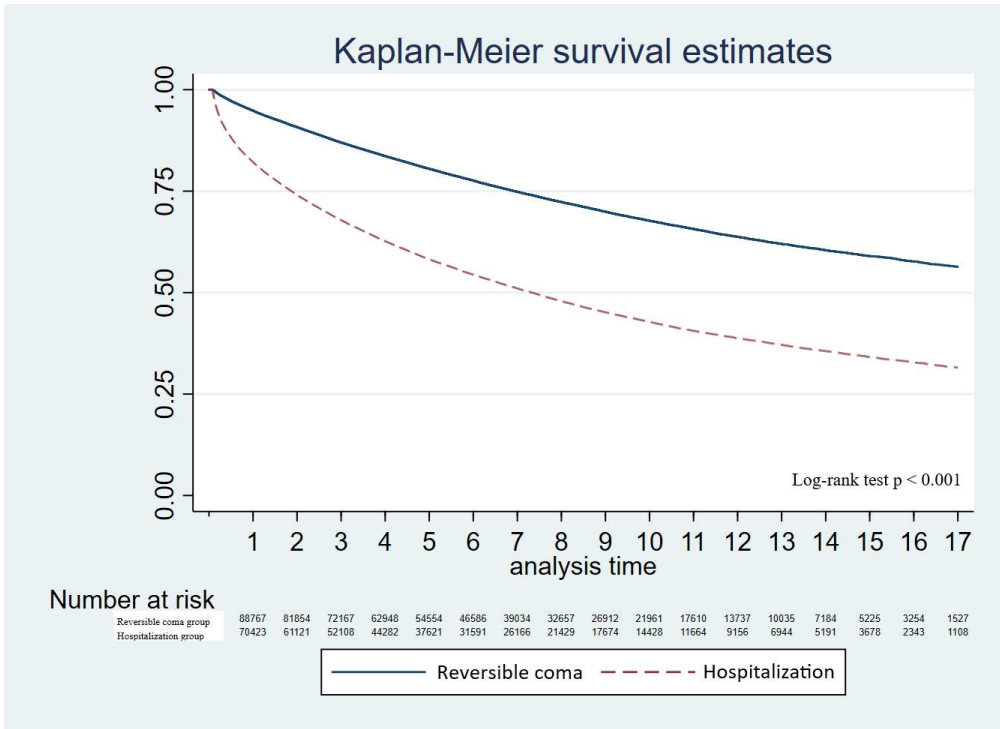

Supplementary Figure 1    Survival analysis of acute coma patients

Supplement: inline-supplementary-material-5 [file inline-supplementary-material-5.pdf]
